# Supplementary material for: CRISPR/Cas12a-Based Detection Platform for Early and Rapid Diagnosis of Scrub Typhus
Source: MDPI journal article supplement (doi:10.3390/bios13121021), 2023-12-08
Supplement: s1 [file s1]

## Supplementary Information

### CRISPR/Cas12a- Based Detection Platform for Early and Rapid Diagnosis of Scrub Typhus

Pooja Bhardwaj<sup>1</sup>, Nikita Nanaware<sup>2</sup>, Sthita Pragnya Behera<sup>1</sup>, Smita Kulkarni<sup>2</sup>, Hirawati Deval<sup>1</sup>, Rajesh Kumar<sup>3</sup>, Gaurav Raj Dwivedi<sup>1</sup>, Rajni Kant<sup>1</sup>, Rajeev Singh<sup>1\*</sup>

<sup>1</sup>ICMR-Regional Medical Research Centre Gorakhpur, BRD medical college campus, Gorakhpur, 273013, India

<sup>2</sup>ICMR-National AIDS Research Institute, Bhosari, Pune, 411026, India

<sup>3</sup>RGSC, Banaras Hindu University, Department of Genetics and Plant Breeding, Varanasi-221005, U.P. India

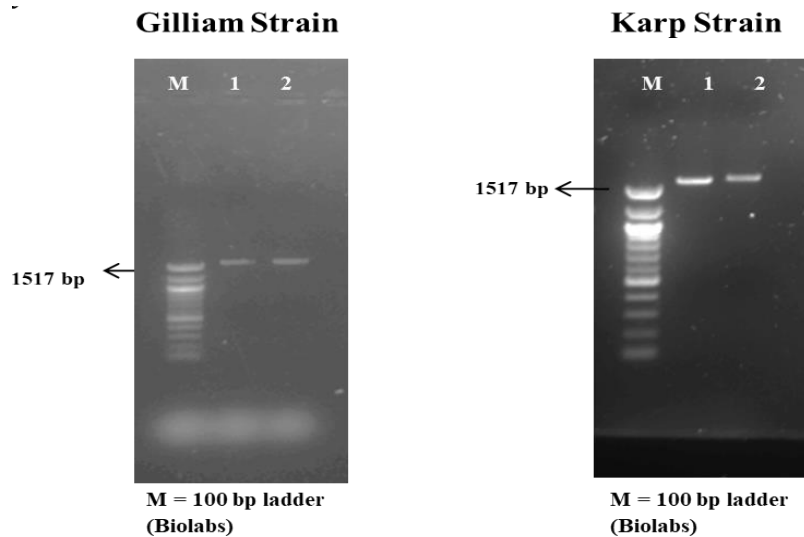

**Figure S1:** Gel image showing complete OT-56kDa ORF amplified gene from Gilliam and Karp strain of *Orientia tsutsugamushi*.

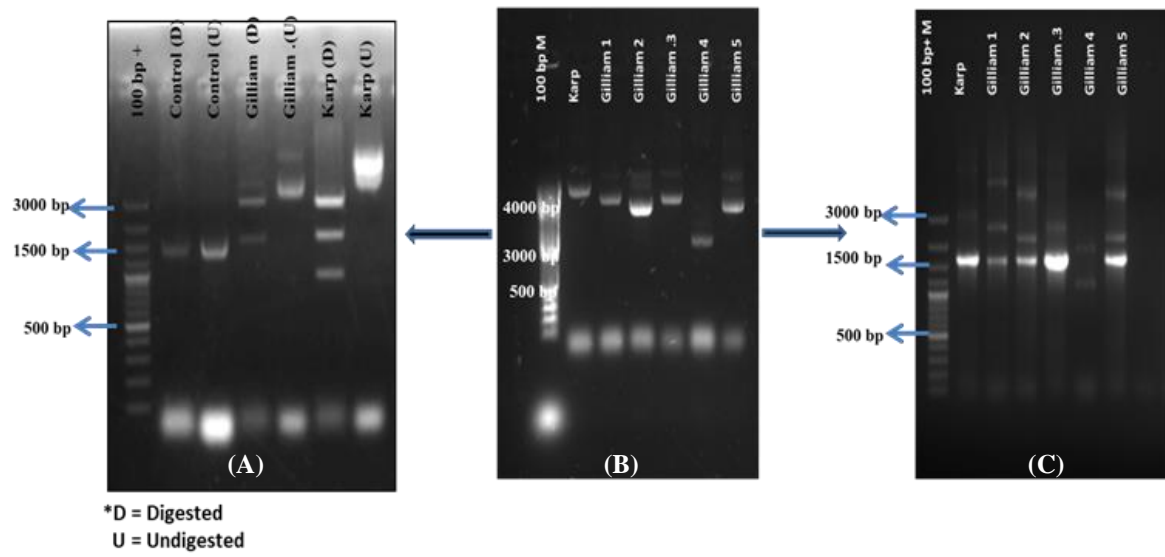

**Figure S2:** Gel image showing (A) Restriction digestion of the recombinant plasmid with *SpeI* and *SacII*. (B) Plasmid isolated from the transformed colony. (C) PCR using plasmid as template.

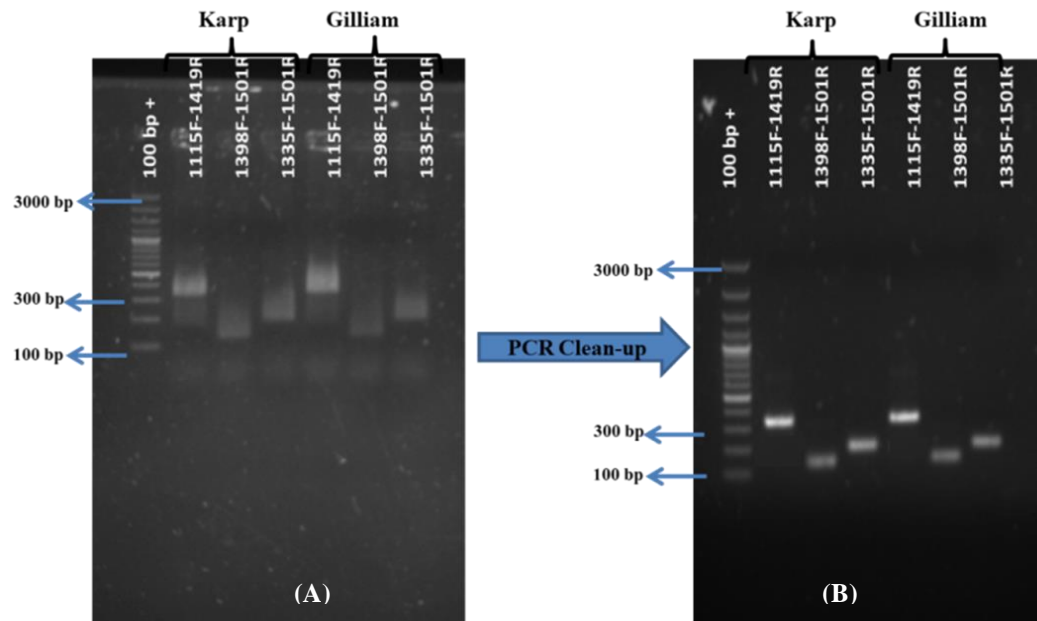

**Figure S3:** Gel image showing (A) RPA with different in-house designed RPA primers with OT strain Gilliam and Karp. (B) RPA PCR-purified products respective of gel image A.

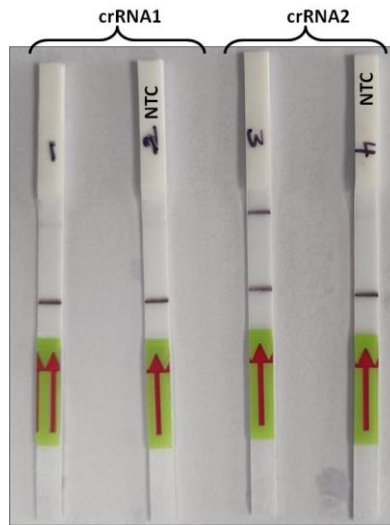

**Figure S4:** CRISPR/Cas12a-based detection of ST. The 56 kDa recombinant plasmid with a 1000 copies per reaction was used for the optimization of the detection platform.

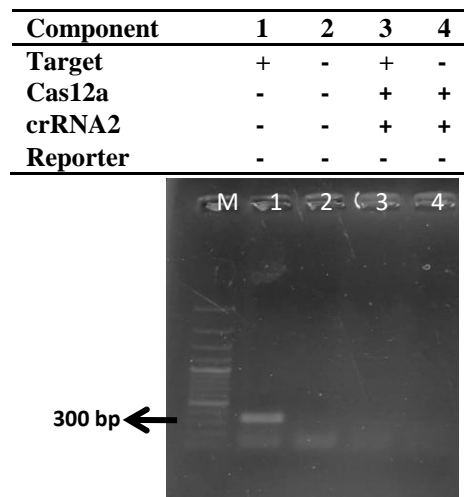

**Figure S5:** Gel image showing the CRISPR/Cas12a reaction before and after the CRISPR/Cas12a reaction.

**Table S1:** List of primers used in this study

| S. No. | Primer Name          | Purpose                  | Sequence 5'>3'                                      | Reference               |
|--------|----------------------|--------------------------|-----------------------------------------------------|-------------------------|
| 1      | TSA56F1              | 56 kDa gene Complete ORF | <u>AAGAAT</u> GAAAAAAATTATGTTAATTGC                 | (Bhardwaj et al., 2023) |
| 2      | TSA56R1              |                          | AAA <u>ACTAG</u> AAGTTATAGCGYACAC                   |                         |
| 3      | cr56kDa1 (1475-1495) | 56 kDa CRISPR/Cas-LFA    | UAAUUUCUACUAAGUGUAGAU <u>CAUAAGUAUGAG CUAACCCU</u>  | This study              |
| 4      | cr56kDa2 (1381-1401) |                          | UAAUUUCUACUAAGUGUAGAU <u>AUCUGAGUAUGA UUGUUGGCC</u> | This study              |
| 5      | ssDNA Cas12a         |                          | 5'-6FAM/TTATTATT/Biotin-3'                          | (Sun et al., 2021)      |
| 6      | OTS1115F             | 56 kDa RPA               | GATCTTGTTAARTTGCAGCGTCATGCAGGA                      | This study              |
| 7      | RPA1419R             |                          | TGCTACACCAAGTGCYCCTGATGCAACCATG                     | This study              |
| 8      | OTS1398F             |                          | GGATATTAAAGSGCATACAGGCATGGTTGC                      | This study              |
| 9      | OTS1335F             |                          | ATTCTCAATATATGCTGGTSYTGGTGCAGG                      | This study              |
| 10     | OTS1501R             |                          | TGARTACTTCTCTTCTATTTTACTGAATGA                      | This study              |
| 11     | OTS1268F             |                          | CAGAGTTTGATCTGAGTATGATTGTCGGC                       | This study              |
| 12     | OTS1448R             |                          | GCTACACCAAGTGCTACTGATGCTACTATG                      | This study              |

**Table S2:** Target amplicon sequence with forward and reverse primer highlighted

|                   |                                                                                                                                                                                                                                                                                                                                                                                                                                                                                                                                                                                                            |         |
|-------------------|------------------------------------------------------------------------------------------------------------------------------------------------------------------------------------------------------------------------------------------------------------------------------------------------------------------------------------------------------------------------------------------------------------------------------------------------------------------------------------------------------------------------------------------------------------------------------------------------------------|---------|
| Complete Gene ORF | <p>AT<b>GAAAAAAATTATGTTAATTGC</b>TAGTGCAATGTCTGCATTGTCATTGCCGTTTTTCAGCTAGTGCAATAG AATTGGGTGAGGAAGGAGGATTAGAGTGTGGTCCTTACGGTAAAGTTGGAATCGTTGGAGGAATGATTAC TGGTGCAGAACTCTACTCGCTTGGATTCACTGATTCTGAGGGAAAAAACATTGTCAATTAACAACCTGGA CTGCCATTTGGTGGTACATTAGCTGCGGGTATGACAATTGCACCAGGATTTAGAGCAGAGCTAGGTGTTA TGTACCTTAGAAATATAAGCGCTGAGGTTGAAGTAGGTAAAGGCAAGGTAGATTCTAAAGGTGAGATAAA GGCAGATTCTGGAGGTGGGACAGATACTCCTATACGTAAGCGGTTTAAACTTACACCACCTCAGCCTACT ATAATGCCTATAAGTATAGCTGATCGTGATGTGGGGGTTGATACTGATATTCTTGCTCAAGCTGCTGCTG GGCAACCACAGCTTACTGTTGAGCAGCGGGCTGCAGATAGGATTGCTTGGTTGAAGAATTATGCTGGTAT TGA</p> | 1556 bp |
| RPA (1115F-1419R) | <p><b>GATCTTGTTAAATTGCAGCGTCATGCAGGA</b>GTAAAGAAAGCCATGGAAAAATTAGCTGCCCAACAAGAA GAAGATGCAAAGAATCAAGGTGAAGGTGACTGTAAGCAGCAACAAGGAGCATCTGAAAAATCTAAAGAAG GAAAAGGCAAAGAAACAGAG<b>TTTGATCTGAGTATGATTGTTGGCCAAGTTAAACTCTATGCTGACTTATTT</b> ACAACTGAATCATTCTCAATATATGCTGGTGTGGTGCAGGGTTAGCTCATACTTATGGAAAAATAGATG ATAAGGATATTAAGGGCATACAGG<b>CATGGTTGCATCAGGAGCACTTGGTGTAGCA</b></p>                                                                                                                                                                                                                             | 336 bp  |

#Sequence underline represent the nucleotide bases used to design CRISPR RNA (crRNA) for target detection. Sequence in purple colour is PAM sequence.
